# Supplementary material for: Lysophosphatidic Acid Receptor 3 Activation Is Involved in the Regulation of Ferroptosis
Source: Int J Mol Sci. 2024 Feb 15;25(4):2315. doi: 10.3390/ijms25042315 (PMC10889550; doi:10.3390/ijms25042315)
Supplement: Supplementary file 1 [file ijms-25-02315-s001.zip › ijms-2837242-supplementary.pdf]

**Figure S1. Western blot images developed by UVP illuminator**

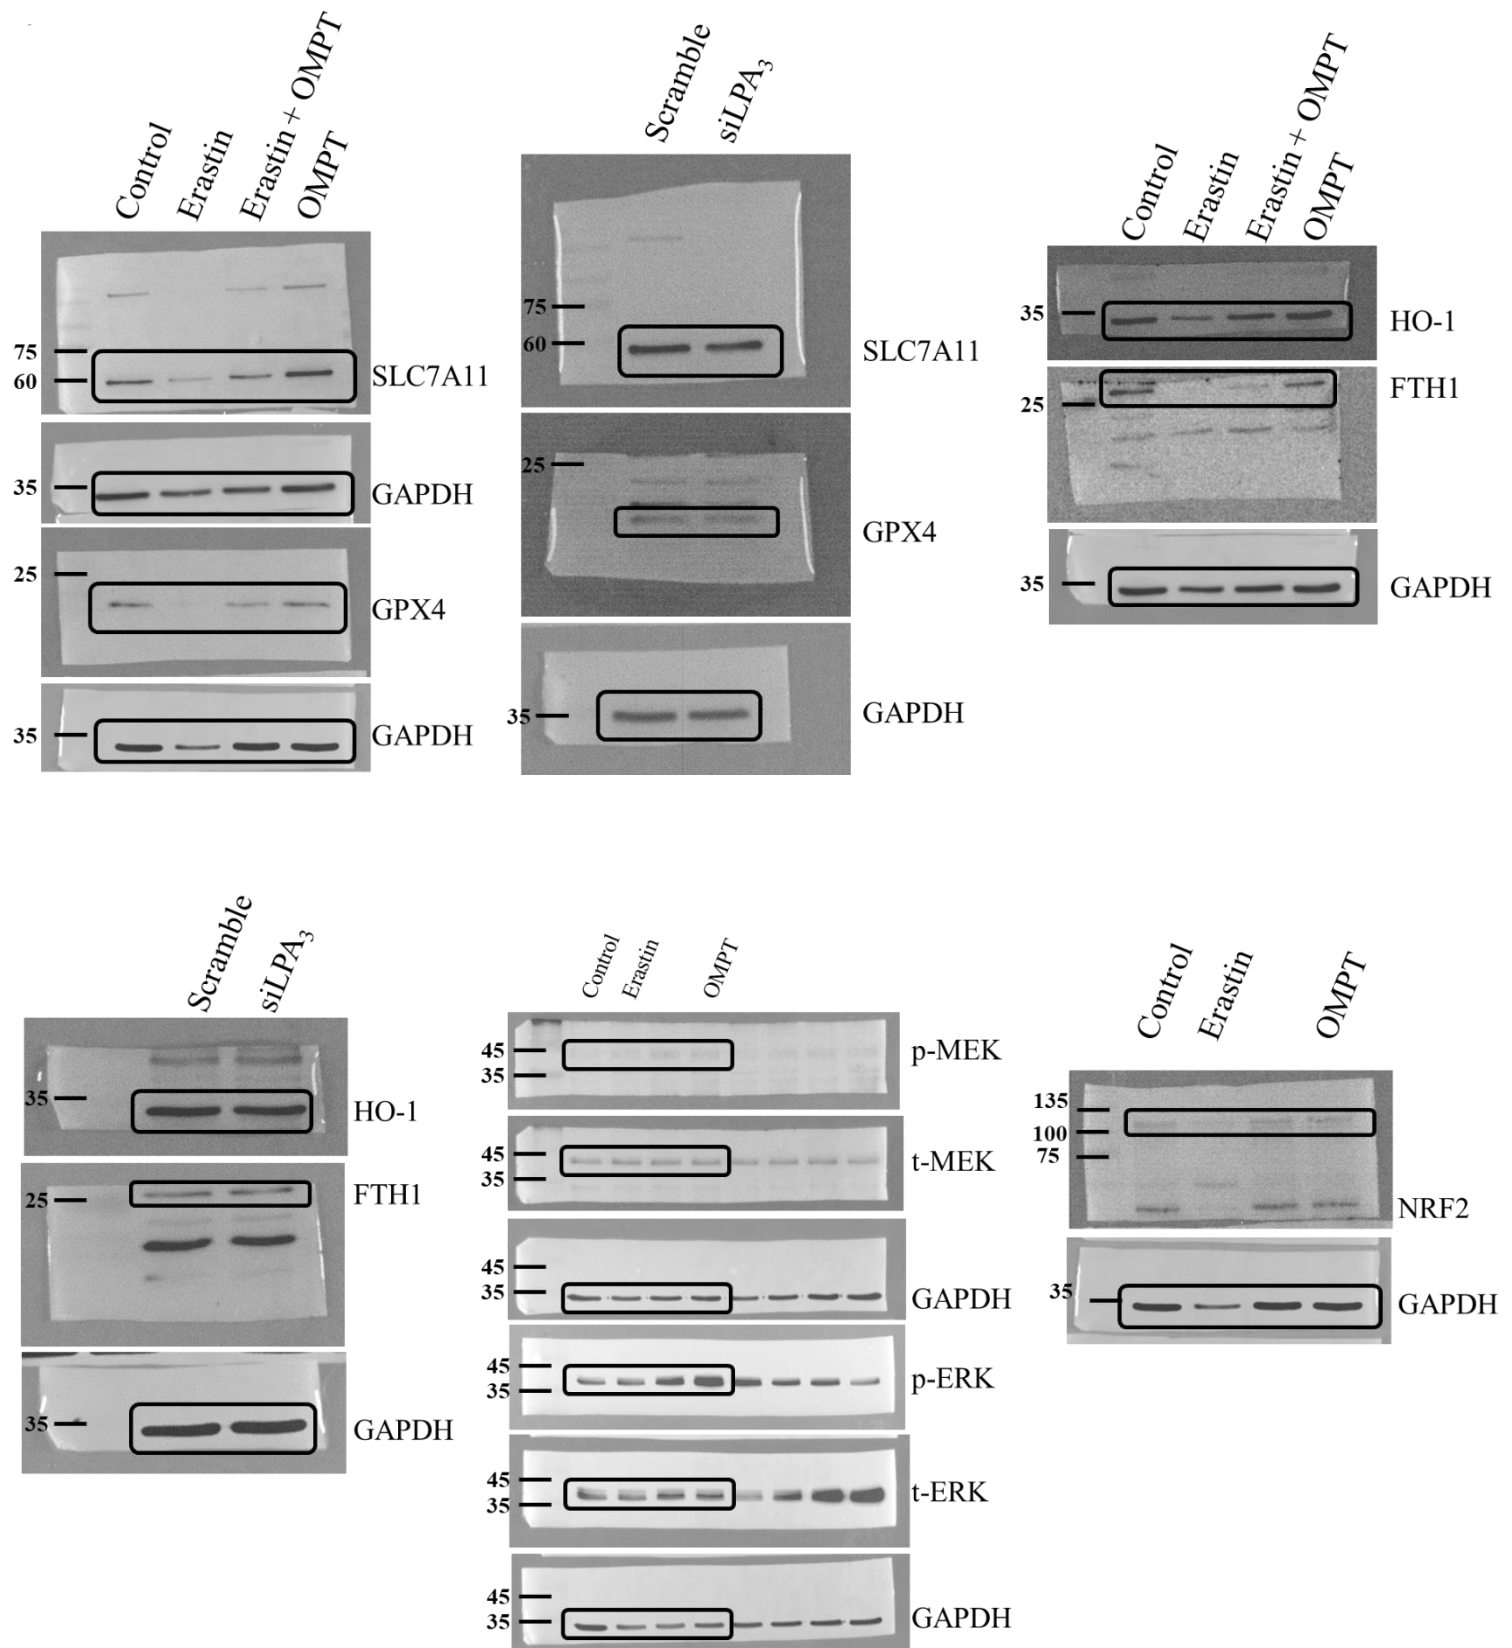

**Table S1. Western blot analyses of LPAR3 knockdown SLC7A11**

|                                               |                     |          |                    |
|-----------------------------------------------|---------------------|----------|--------------------|
| Table Analyzed                                | SLC7A11             | Scramble | siLPA <sub>3</sub> |
|                                               |                     | 1        | 0.780741           |
| Column B                                      | siLPA <sub>3</sub>  | 1        | 0.89553            |
| vs.                                           | vs.                 | 1        | 0.700098           |
| Column A                                      | Scramble            | 1        | 0.888689           |
|                                               |                     |          |                    |
| Unpaired t test                               |                     |          |                    |
| <b>P value</b>                                | <b>0.0077</b>       |          |                    |
| <b>P value summary</b>                        | <b>**</b>           |          |                    |
| <b>Significantly different (P &lt; 0.05)?</b> | <b>Yes</b>          |          |                    |
| One- or two-tailed P value?                   | Two-tailed          |          |                    |
| t, df                                         | t=3.926, df=6       |          |                    |
|                                               |                     |          |                    |
| How big is the difference?                    |                     |          |                    |
| Mean of column A                              | 1                   |          |                    |
| Mean of column B                              | 0.8163              |          |                    |
| Difference between means (B - A) ± SEM        | -0.1837 ± 0.04680   |          |                    |
| 95% confidence interval                       | -0.2983 to -0.06922 |          |                    |
| R squared (eta squared)                       | 0.7198              |          |                    |
|                                               |                     |          |                    |
| F test to compare variances                   |                     |          |                    |
| F, DFn, Dfd                                   | Infinity, 3, 3      |          |                    |
| P value                                       | <0.0001             |          |                    |
| P value summary                               | ****                |          |                    |
| Significantly different (P < 0.05)?           | Yes                 |          |                    |
|                                               |                     |          |                    |
| Data analyzed                                 |                     |          |                    |
| Sample size, column A                         | 4                   |          |                    |
| Sample size, column B                         | 4                   |          |                    |

**Table S2. Western blot analyses of LPAR3 knockdown  
GPX4**

|                                               |                     |          |                    |
|-----------------------------------------------|---------------------|----------|--------------------|
| Table Analyzed                                | GPX4                | Scramble | siLPA <sub>3</sub> |
|                                               |                     | 1        | 0.90336            |
| Column B                                      | siLPA <sub>3</sub>  | 1        | 0.914376           |
| vs.                                           | vs.                 | 1        | 0.852389           |
| Column A                                      | Scramble            |          |                    |
|                                               |                     |          |                    |
| Unpaired t test                               |                     |          |                    |
| <b>P value</b>                                | <b>0.0045</b>       |          |                    |
| <b>P value summary</b>                        | <b>**</b>           |          |                    |
| <b>Significantly different (P &lt; 0.05)?</b> | <b>Yes</b>          |          |                    |
| One- or two-tailed P value?                   | Two-tailed          |          |                    |
| t, df                                         | t=5.759, df=4       |          |                    |
|                                               |                     |          |                    |
| How big is the difference?                    |                     |          |                    |
| Mean of column A                              | 1                   |          |                    |
| Mean of column B                              | 0.89                |          |                    |
| Difference between means (B - A) ± SEM        | -0.1100 ± 0.01909   |          |                    |
| 95% confidence interval                       | -0.1630 to -0.05695 |          |                    |
| R squared (eta squared)                       | 0.8924              |          |                    |
|                                               |                     |          |                    |
| F test to compare variances                   |                     |          |                    |
| F, DFn, Dfd                                   | Infinity, 2, 2      |          |                    |
| P value                                       | <0.0001             |          |                    |
| P value summary                               | ****                |          |                    |
| Significantly different (P < 0.05)?           | Yes                 |          |                    |
|                                               |                     |          |                    |
| Data analyzed                                 |                     |          |                    |
| Sample size, column A                         | 3                   |          |                    |
| Sample size, column B                         | 3                   |          |                    |

**Table S3. Western blot analyses of LPAR3 knockdown****FTH1**

|                                               |                    |          |                    |
|-----------------------------------------------|--------------------|----------|--------------------|
| Table Analyzed                                | FTH1               | Scramble | siLPA <sub>3</sub> |
|                                               |                    | 1        | 0.803041           |
| Column B                                      | siLPA <sub>3</sub> | 1        | 0.702253           |
| vs.                                           | vs.                | 1        | 0.808402           |
| Column A                                      | Scramble           | 1        | 0.639329           |
|                                               |                    | 1        | 0.836733           |
| Unpaired t test                               |                    |          |                    |
| <b>P value</b>                                | <b>0.0002</b>      |          |                    |
| <b>P value summary</b>                        | <b>***</b>         |          |                    |
| <b>Significantly different (P &lt; 0.05)?</b> | <b>Yes</b>         |          |                    |
| One- or two-tailed P value?                   | Two-tailed         |          |                    |
| t, df                                         | t=6.474, df=8      |          |                    |
|                                               |                    |          |                    |
| How big is the difference?                    |                    |          |                    |
| Mean of column A                              | 1                  |          |                    |
| Mean of column B                              | 0.758              |          |                    |
| Difference between means (B - A) ± SEM        | -0.2420 ± 0.03739  |          |                    |
| 95% confidence interval                       | -0.3283 to -0.1558 |          |                    |
| R squared (eta squared)                       | 0.8397             |          |                    |
|                                               |                    |          |                    |
| F test to compare variances                   |                    |          |                    |
| F, DFn, Dfd                                   | Infinity, 4, 4     |          |                    |
| P value                                       | <0.0001            |          |                    |
| P value summary                               | ****               |          |                    |
| Significantly different (P < 0.05)?           | Yes                |          |                    |
|                                               |                    |          |                    |
| Data analyzed                                 |                    |          |                    |
| Sample size, column A                         | 5                  |          |                    |
| Sample size, column B                         | 5                  |          |                    |

**Table S4. Western blot analyses of LPAR3 knockdown  
HO-1**

|                                               |                     |          |                    |
|-----------------------------------------------|---------------------|----------|--------------------|
| Table Analyzed                                | HO-1                | Scramble | siLPA <sub>3</sub> |
|                                               |                     | 1        | 0.842527           |
| Column B                                      | siLPA <sub>3</sub>  | 1        | 0.915276           |
| vs.                                           | vs.                 | 1        | 0.912908           |
| Column A                                      | Scramble            | 1        | 0.887303           |
|                                               |                     | 1        | 0.843381           |
| Unpaired t test                               |                     |          |                    |
| <b>P value</b>                                | <b>&lt;0.0001</b>   |          |                    |
| <b>P value summary</b>                        | <b>****</b>         |          |                    |
| <b>Significantly different (P &lt; 0.05)?</b> | <b>Yes</b>          |          |                    |
| One- or two-tailed P value?                   | Two-tailed          |          |                    |
| t, df                                         | t=7.479, df=8       |          |                    |
|                                               |                     |          |                    |
| How big is the difference?                    |                     |          |                    |
| Mean of column A                              | 1                   |          |                    |
| Mean of column B                              | 0.8803              |          |                    |
| Difference between means (B - A) ± SEM        | -0.1197 ± 0.01601   |          |                    |
| 95% confidence interval                       | -0.1566 to -0.08281 |          |                    |
| R squared (eta squared)                       | 0.8749              |          |                    |
|                                               |                     |          |                    |
| F test to compare variances                   |                     |          |                    |
| F, DFn, Dfd                                   | Infinity, 4, 4      |          |                    |
| P value                                       | <0.0001             |          |                    |
| P value summary                               | ****                |          |                    |
| Significantly different (P < 0.05)?           | Yes                 |          |                    |
|                                               |                     |          |                    |
| Data analyzed                                 |                     |          |                    |
| Sample size, column A                         | 5                   |          |                    |
| Sample size, column B                         | 5                   |          |                    |
